# Supplementary material for: Frequency and significance of parvovirus B19 infection in patients with rheumatoid arthritis
Source: PubMed Central journal article supplement (PMC5203673; doi:10.1099/jgv.0.000621), 2016-12-15
Supplement: jgv-97-3302-s001.pdf [file jgv-97-3302-s001.pdf]

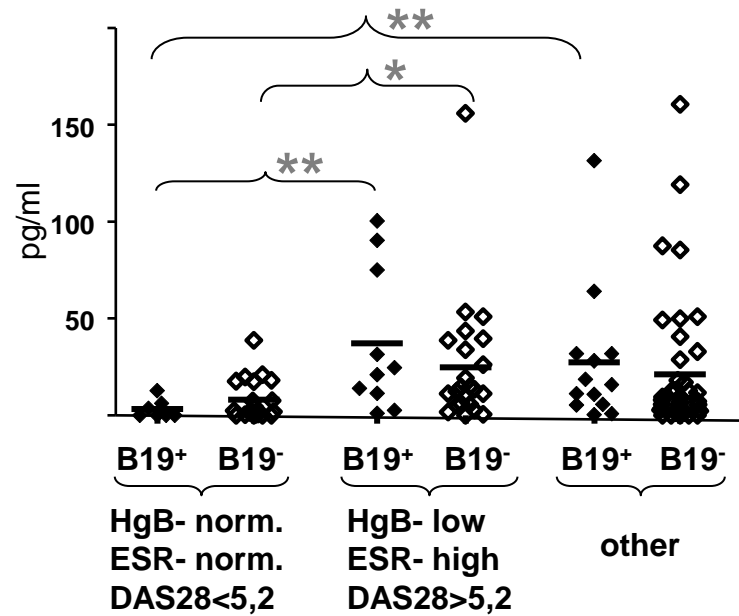

**Fig. S1.** The levels of IL-6 in B19 DNA positive (B19<sup>+</sup>) and parvovirus B19 negative (B19<sup>-</sup>) rheumatoid arthritis patients that fulfill the criteria: low HgB, high ESR, DAS28>5.2 and normal HgB, normal ESR and DAS28<5.2. One symbol shows the amount of IL-6 (pg /mL) of one person. The results significant according to Mann-Whitney U test are marked by stars: p<0.05 (\*) or p<0.005 (\*\*)

(a)

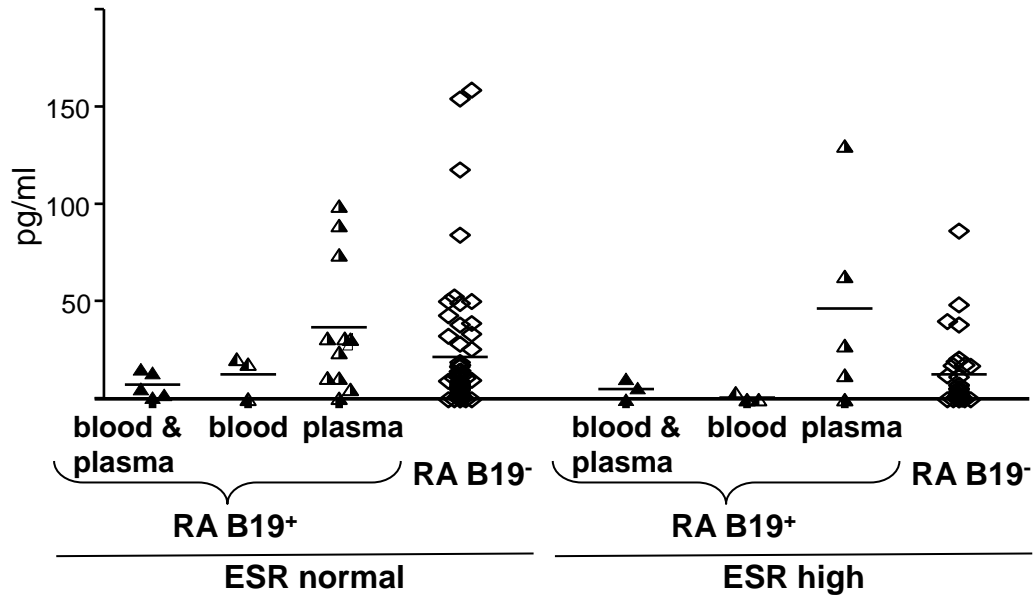

**Fig. S2. The amount of IL-6 in the plasma of parvovirus B19 DNA positive (B19<sup>+</sup>) and parvovirus B19 negative (B19<sup>-</sup>) rheumatoid arthritis patients.**

The patients are divided into the groups accordingly to the findings of virus DNA (in blood and cell-free plasma, blood or cell-free plasma) and normal and high levels of ESR high (a); normal and high levels of WBC (b);  $\alpha$ CCP<60 and  $\alpha$ CCP>60 (c); RF<250 and RF>250 (d). One symbol shows the amount of IL-6 (pg/mL) of one person. The results significant according to Mann-Whitney U test are marked by stars:  $p < 0.05$  (\*) or  $p < 0.005$  (\*\*)

(b)

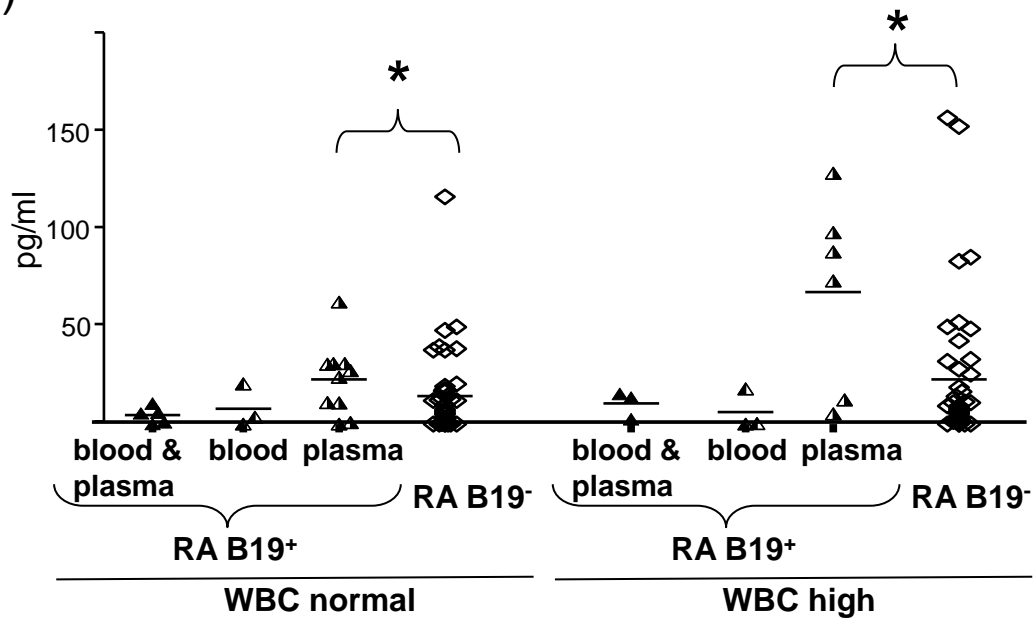

(c)

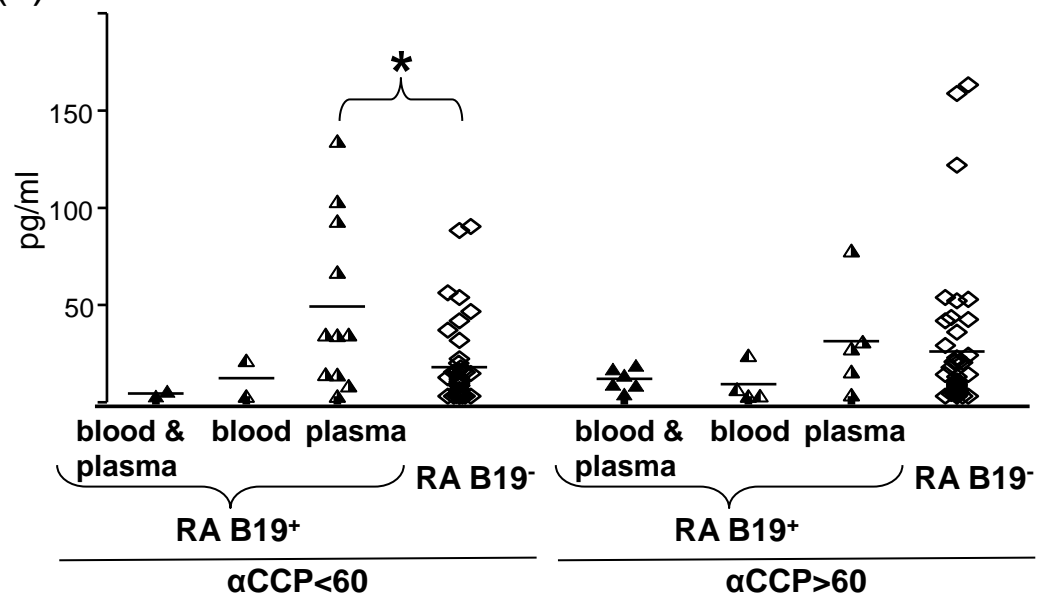

(d)

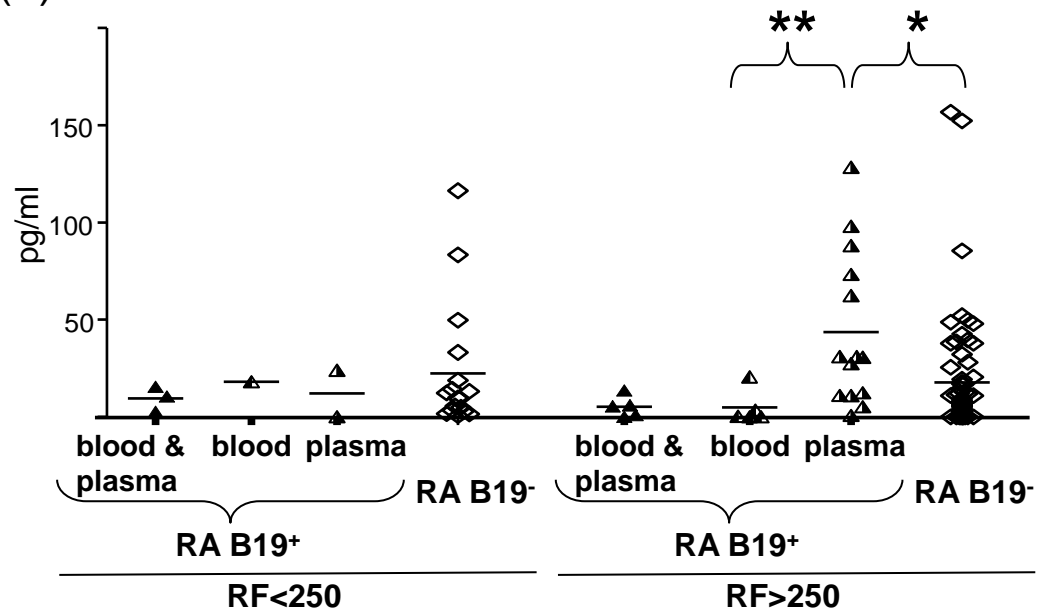

Table S1. Parvovirus B19 infection markers in rheumatoid arthritis patients and healthy persons

| Parvovirus B19 infection marker/s                               | Numbers of  |                      | IL-6 concentration, pg/ml |                      | Infection                                     |
|-----------------------------------------------------------------|-------------|----------------------|---------------------------|----------------------|-----------------------------------------------|
|                                                                 | RA patients | Healthy blood donors | RA patients               | Healthy blood donors |                                               |
| Blood DNA positive & IgM negative & IgG positive                | 5           | 7                    | 8.7±10.2                  | 1.0±1.2              | Persistent infection in latent phase          |
| Blood DNA positive & IgM negative & IgG negative                | 1           | 1                    | 0                         | 0                    | Persistent infection in latent phase          |
| Plasma DNA positive & IgM negative & IgG positive               | 15          | 0                    | 41.3±41.1                 | -                    | Persistent infection in active phase          |
| Plasma DNA positive & IgM negative & IgG negative               | 1           | 1                    | 31.8                      | 0                    | Could be acute infection                      |
| Blood DNA and plasma DNA positive & IgM negative & IgG positive | 7           | 0                    | 6.5±6.2                   | -                    | Persistent infection in active phase          |
| Blood DNA and plasma DNA positive & IgM negative & IgG negative | 1           | 0                    | 10.8                      | -                    | Acute or persistent infection in active phase |
| DNA negative & IgM negative & IgG positive                      | 76          | 32                   | 20.4±32.2                 | 2.0±3.8              | Past infection                                |
| DNA negative & IgM negative & IgG negative                      | 12          | 8                    | 10.4±13.0                 | 0.5±1.4              | Without infection                             |
| <b>Number of analysed</b>                                       | <b>118</b>  | <b>49</b>            |                           |                      |                                               |

Table S2. The amount of antibodies in sera of RA patients and control persons detected by Biotrin ELISA and Microgen RecomLine dot blot

| Patients, code                | B19V DNA detected |        | Biotrin ELISA |            | Microgen, RecomLine |            |            |            |      |      |             |             |             |            |      |      |
|-------------------------------|-------------------|--------|---------------|------------|---------------------|------------|------------|------------|------|------|-------------|-------------|-------------|------------|------|------|
|                               | blood             | plasma | IgM           | IgG        | IgM                 |            |            |            |      |      | IgG         |             |             |            |      |      |
|                               |                   |        |               |            | VP-2P               | VP-N       | VP-1S      | VP2r       | VP-C | NS-1 | VP-2P       | VP-N        | VP-1S       | VP2r       | VP-C | NS-1 |
| <b>RA. B19<sup>+</sup>b/p</b> |                   |        |               |            |                     |            |            |            |      |      |             |             |             |            |      |      |
| T95                           | +                 | +      | 0.4           | <b>7.9</b> | <b>3.4</b>          | <b>3.2</b> | 0.6        | 0          | 0    | 0    | <b>10.9</b> | <b>12.7</b> | <b>15.5</b> | <b>2.6</b> | 0.7  | 0    |
| T118                          | +                 | +      | 0.2           | <b>7.9</b> | <b>1.9</b>          | <b>3.6</b> | 0.1        | 0          | 0    | 0    | <b>7.6</b>  | <b>13.6</b> | <b>15.1</b> | <b>2.1</b> | 0    | 0.7  |
| T105                          | +                 | +      | 0.2           | <b>3.6</b> | 0.7                 | 0          | 0          | 0          | 0    | 0    | <b>1.5</b>  | 0.4         | 0.1         | 0          | 0    | 0    |
| T94                           | +                 | +      | 0.1           | 0.3        | 0                   | 0.5        | 0          | 0          | 0    | 0    | 0           | 0           | 0           | 0          | 0    | 0    |
| <b>RA. B19<sup>+</sup>b</b>   |                   |        |               |            |                     |            |            |            |      |      |             |             |             |            |      |      |
| T123                          | +                 |        | 0.2           | <b>7.6</b> | <b>3.2</b>          | 0          | 0          | 0          | 0    | 0    | <b>6.4</b>  | <b>8.7</b>  | <b>9.1</b>  | 0.4        | 0.2  | 0.1  |
| T121                          | +                 |        | 0.2           | <b>7.4</b> | 1.0                 | 0.2        | 0          | <b>1.1</b> | 0    | 0.2  | <b>3.9</b>  | <b>1.5</b>  | <b>1.3</b>  | 0          | 0    | 0    |
| T133                          | +                 |        | 0.1           | <b>5.4</b> | <b>4.1</b>          | 1          | 0          | 0.6        | 0    | 0    | <b>7.4</b>  | <b>3.5</b>  | <b>2.7</b>  | <b>1.5</b> | 0    | 0    |
| T142                          | +                 |        | 0.2           | <b>2.4</b> | 0                   | 0.4        | 0          | 0          | 0    | 0    | <b>1.5</b>  | <b>8.5</b>  | <b>7.9</b>  | 0          | 0    | 0    |
| T109                          | +                 |        | 0.2           | <b>5.4</b> | 0                   | 0          | 0          | 0          | 0    | 0    | <b>1.4</b>  | 0.3         | 0.0         | 0          | 0    | 0    |
| <b>RA. B19<sup>+</sup>p</b>   |                   |        |               |            |                     |            |            |            |      |      |             |             |             |            |      |      |
| T104                          |                   | +      | 0.2           | <b>8.8</b> | <b>1.1</b>          | <b>5.8</b> | <b>3.1</b> | 0          | 0    | 0    | <b>10.6</b> | <b>20.6</b> | <b>26.5</b> | <b>1.7</b> | 0    | 0    |
| T122                          |                   | +      | 0.1           | <b>7.5</b> | ND                  | ND         | ND         | ND         | ND   | ND   | <b>2.7</b>  | <b>3.9</b>  | <b>3.2</b>  | <b>2.0</b> | 0.9  | 0    |
| T101                          |                   | +      | 0.2           | <b>7.3</b> | <b>1.2</b>          | <b>3.5</b> | <b>1.2</b> | 0.5        | 0.5  | 0    | <b>4.7</b>  | <b>9.7</b>  | <b>11.8</b> | 0          | 0    | 0    |
| T128                          |                   | +      | 0.1           | <b>4.6</b> | 0.5                 | 0          | 0          | 0          | 0    | 0    | <b>4.3</b>  | <b>1.9</b>  | <b>2.1</b>  | 0          | 1.0  | 0    |
| T 99                          |                   | +      | 0.2           | <b>1.7</b> | ND                  | ND         | ND         | ND         | ND   | ND   | <b>0.9</b>  | <b>1.2</b>  | <b>1.7</b>  | 0.9        | 0    | 0    |
| T116                          |                   | +      | 0.1           | <b>5.2</b> | 0                   | 0          | 0          | 0          | 0    | 0    | <b>2.8</b>  | <b>1.1</b>  | 0.7         | 0          | 0    | 0    |
| T97                           |                   | +      | 0.1           | <b>7.3</b> | 0                   | 0          | 0          | 0          | 0    | 0    | <b>2.8</b>  | 0.7         | 0           | 0          | 0    | 0    |
| T103                          |                   | +      | 0.1           | <b>4.6</b> | 0                   | 0          | 0          | 0          | 0    | 0    | <b>2.0</b>  | 0           | 0           | 0          | 0    | 0    |
| T106                          |                   | +      | 0.1           | <b>2.3</b> | 0                   | 0          | 0          | 0          | 0    | 0    | <b>1.1</b>  | 0.7         | 0           | 0          | 0    | 0    |
| T98                           |                   | +      | 0.2           | <b>1.7</b> | 0                   | 0          | 0          | 0          | 0    | 0    | <b>1.2</b>  | 0.9         | 0.6         | 0          | 0    | 0    |
| <b>T100</b>                   |                   | +      | 0.3           | <b>3.0</b> | ND                  | ND         | ND         | ND         | ND   | ND   | 0.9         | 0           | 0           | 0          | 0    | 0    |
| T93                           |                   | +      | 0.1           | <b>1.8</b> | 0                   | <b>2.5</b> | 0.4        | 0.5        | 0    | 0    | 1.0         | 0           | 0           | 0          | 0    | 0    |
| T102                          |                   | +      | 0.1           | 0.1        | ND                  | ND         | ND         | ND         | ND   | ND   | 0.6         | 0           | 0           | 0          | 0    | 0    |

RA. B19'

|      |     |     |     |     |    |     |    |     |     |      |      |     |     |     |
|------|-----|-----|-----|-----|----|-----|----|-----|-----|------|------|-----|-----|-----|
| T115 | 0.2 | 8.4 | 1.1 | 2.2 | 0  | 0   | 0  | 0   | 6.7 | 9.5  | 10.8 | 4.1 | 0   | 0   |
| T108 | 0.1 | 8.2 | 3.8 | 0   | 0  | 0   | 0  | 0   | 7.4 | 6.2  | 6.5  | 5.3 | 2.7 | 0   |
| T107 | 0.3 | 7.8 | 2.5 | 0.3 | 0  | 1.7 | 0  | 0   | 5.7 | 3.7  | 3.5  | 1.7 | 0.2 | 0   |
| T117 | 0.1 | 7.4 | 0   | 0   | 0  | 0   | 0  | 0   | 5.0 | 2.7  | 2.8  | 3.2 | 0.9 | 0.6 |
| T119 | 0.1 | 6.2 | 0.3 | 0   | 0  | 0   | 0  | 0   | 5.0 | 6.4  | 6.4  | 1.6 | 0.4 | 0   |
| T124 | 0.4 | 7.9 | 0.4 | 0.2 | 0  | 0.3 | 0  | 0.3 | 7.0 | 3.5  | 3.4  | 0   | 0   | 0   |
| T113 | 0.2 | 6.8 | 0   | 0.3 | 0  | 0   | 0  | 0   | 4.2 | 2.9  | 1.8  | 0   | 0   | 0   |
| T138 | 0.2 | 6.8 | 4.4 | 0   | 0  | 0   | 0  | 0   | 4.8 | 4.0  | 4.1  | 0   | 0   | 0   |
| T126 | 0.1 | 6.8 | 4.6 | 0.5 | 0  | 0   | 0  | 0   | 7.0 | 8.6  | 9.9  | 0.5 | 0   | 0   |
| T110 | 0.1 | 6.6 | 0.7 | 6.2 | 0  | 0   | 0  | 0   | 3.4 | 12.6 | 15.3 | 0   | 0   | 0   |
| T112 | 0.2 | 6.3 | 0.3 | 0.4 | 0  | 0   | 0  | 0   | 4.1 | 2.7  | 2.6  | 0   | 0   | 0   |
| T 89 | 0.2 | 4.4 | ND  | ND  | ND | ND  | ND | ND  | 1.3 | 2.9  | 2.8  | 0   | 0   | 0   |
| T134 | 0.1 | 4.3 | ND  | ND  | ND | ND  | ND | ND  | 1.2 | 3.1  | 2.5  | 0.6 | 0   | 0   |
| T 81 | 0.2 | 4.0 | ND  | ND  | ND | ND  | ND | ND  | 1.5 | 2.0  | 1.4  | 0   | 0   | 0   |
| T132 | 0.1 | 5.1 | ND  | ND  | ND | ND  | ND | ND  | 1.7 | 1.3  | 0.7  | 0.4 | 0.5 | 0   |
| T 96 | 0.2 | 4.9 | ND  | ND  | ND | ND  | ND | ND  | 2.7 | 1.3  | 0.5  | 0   | 0   | 0   |
| T 80 | 0.2 | 1.9 | ND  | ND  | ND | ND  | ND | ND  | 0.8 | 1.2  | 0.7  | 0   | 0   | 0   |
| T 28 | 0.2 | 1.2 | ND  | ND  | ND | ND  | ND | ND  | 0.8 | 1.1  | 0    | 0   | 0   | 0   |
| T114 | 0.1 | 6.9 | 0.4 | 0   | 0  | 0   | 0  | 0   | 2.7 | 0.6  | 0    | 0   | 0   | 0   |
| T139 | 0.2 | 5.5 | ND  | ND  | ND | ND  | ND | ND  | 1.4 | 0.8  | 0.6  | 0   | 0   | 0   |
| T111 | 0.1 | 5.0 | ND  | ND  | ND | ND  | ND | ND  | 1.3 | 0.6  | 0.6  | 0   | 0   | 0   |
| T125 | 0.1 | 4.9 | ND  | ND  | ND | ND  | ND | ND  | 1.2 | 0.7  | 0.6  | 0   | 0   | 1.1 |
| T131 | 0.1 | 3.8 | ND  | ND  | ND | ND  | ND | ND  | 1.1 | 0.5  | 0    | 0   | 0   | 0   |
| T 31 | 0.2 | 2.9 | ND  | ND  | ND | ND  | ND | ND  | 1.3 | 0.9  | 0.7  | 0   | 0.7 | 0.5 |
| T 43 | 0.2 | 4.4 | ND  | ND  | ND | ND  | ND | ND  | 1.0 | 0.8  | 0.7  | 0   | 0   | 0   |
| T127 | 0.2 | 5.6 | ND  | ND  | ND | ND  | ND | ND  | 1.0 | 0    | 0    | 0.8 | 1.0 | 0   |
| T135 | 0.2 | 4.3 | ND  | ND  | ND | ND  | ND | ND  | 1.0 | 0.6  | 0    | 0   | 0.7 | 0   |
| T 84 | 0.2 | 2.9 | ND  | ND  | ND | ND  | ND | ND  | 0.9 | 0    | 0    | 0   | 0   | 0   |
| T140 | 0.6 | 2.5 | ND  | ND  | ND | ND  | ND | ND  | 0.8 | 0.9  | 0.7  | 0   | 0   | 0   |
| T 3  | 0.0 | 2.5 | ND  | ND  | ND | ND  | ND | ND  | 0.7 | 0    | 0    | 0   | 0   | 0   |
| T130 | 0.2 | 1.5 | ND  | ND  | ND | ND  | ND | ND  | 0   | 0    | 0    | 0   | 0   | 0   |
| T152 | 0.1 | 0.6 | ND  | ND  | ND | ND  | ND | ND  | 0   | 0    | 0    | 0   | 0   | 0   |
| T120 | 0.1 | 0.4 | ND  | ND  | ND | ND  | ND | ND  | 0.8 | 0    | 0    | 0   | 0   | 0   |

|                                 |   |     |            |      |     |     |     |    |    |             |             |             |            |            |            |
|---------------------------------|---|-----|------------|------|-----|-----|-----|----|----|-------------|-------------|-------------|------------|------------|------------|
| <b>Control. B19<sup>+</sup></b> |   |     |            |      |     |     |     |    |    |             |             |             |            |            |            |
| K45                             | + | 0.1 | <b>8.1</b> | 0.5  | 0.4 | 0.4 | 0.3 | 0  | 0  | 4.9         | <b>2.8</b>  | <b>2.5</b>  | 0.7        | 0          | 0          |
| K20                             | + | 0.1 | <b>7.8</b> | 0    | 0   | 0   | 0   | 0  | 0  | <b>5.2</b>  | <b>3.3</b>  | <b>3.1</b>  | 0.9        | 0.4        | 0.7        |
| K9                              | + | 0.1 | <b>4.3</b> | 0    | 0   | 0   | 0   | 0  | 0  | <b>2.2</b>  | <b>2.4</b>  | <b>1.8</b>  | 0          | 0          | 0          |
| K39                             | + | 0.2 | <b>3.0</b> | 0.8  | 0.7 | 0.7 | 0.9 | 0  | 0  | 1.9         | <b>3.6</b>  | <b>3.4</b>  | 0.1        | 0          | 0.3        |
| K41                             | + | 0.2 | <b>2.9</b> | 0    | 0   | 0   | 0   | 0  | 0  | 1.2         | <b>7.5</b>  | <b>9.4</b>  | 0          | 0          | 0          |
| K37                             | + | 0.1 | <b>3.3</b> | 0    | 0   | 0   | 0.5 | 0  | 0  | 2.7         | 1.0         | <b>1.8</b>  | 0          | 0          | 0          |
| K24                             | + | 0.1 | <b>3.4</b> | 0    | 0.5 | 0   | 0   | 0  | 0  | <b>2.5</b>  | <b>1.1</b>  | 0.6         | 0.4        | 0          | 0.3        |
| K36                             | + | 0.2 | 0.9        | 0.4  | 0.5 | 0   | 0.4 | 0  | 0  | 0           | 0.4         | 0           | 0          | 0          | 0          |
| K22                             | + | 0.1 | 0.4        | 0.3  | 0.3 | 0   | 0.4 | 0  | 0  | 0           | 0           | 0           | 0          | 0          | 0.6        |
| <b>Control. B19<sup>-</sup></b> |   |     |            |      |     |     |     |    |    |             |             |             |            |            |            |
| K15                             |   | 0.4 | <b>9.0</b> | 0.4  | 0.9 | 0   | 0.4 | 0  | 0  | <b>8.1</b>  | <b>5.2</b>  | <b>5.8</b>  | <b>2.6</b> | 1.0        | <b>4.0</b> |
| K40                             |   | 0.1 | <b>8.6</b> | 0.4  | 0   | 0   | 0   | 0  | 0  | <b>6.8</b>  | <b>5.4</b>  | <b>5.4</b>  | <b>1.2</b> | 0.4        | 0.7        |
| K16                             |   | 0.2 | <b>8.4</b> | 0.3  | 0.3 | 0   | 0.2 | 0  | 0  | <b>8.8</b>  | <b>12.8</b> | <b>13.6</b> | <b>2.0</b> | 0          | 0          |
| K35                             |   | 0.1 | <b>8.4</b> | 0.3  | 0.3 | 0.3 | 0.5 | 0  | 0  | <b>10.1</b> | <b>11.7</b> | <b>10.1</b> | 0          | 0          | 0          |
| K30                             |   | 0.2 | <b>8.2</b> | 0.47 | 0   | 0   | 0   | 0  | 0  | <b>5.6</b>  | <b>7.1</b>  | <b>8.8</b>  | 0.4        | 0          | 0.0        |
| K32                             |   | 0.1 | <b>8.1</b> | 0    | 0   | 0   | 0   | 0  | 0  | <b>4.5</b>  | <b>3.0</b>  | <b>2.7</b>  | 1.1        | <b>1.1</b> | <b>1.1</b> |
| K3                              |   | 0.1 | <b>8.0</b> | 0.6  | 0.6 | 0.8 | 0   | 0  | 0  | <b>3.9</b>  | <b>1.3</b>  | <b>1.2</b>  | 0.3        | 0          | 0          |
| K26                             |   | 0.1 | <b>7.6</b> | 0    | 0.5 | 0   | 0   | 0  | 0  | <b>5.7</b>  | <b>6.9</b>  | <b>8.2</b>  | 0.7        | 0          | 0.1        |
| K12                             |   | 0.2 | <b>7.1</b> | 0.3  | 0.2 | 0   | 0   | 0  | 0  | <b>6.8</b>  | <b>3.6</b>  | <b>2.3</b>  | 1.0        | 0.1        | 0.1        |
| K2                              |   | 0.1 | <b>6.2</b> | 0.5  | 0.5 | 0.5 | 0   | 0  | 0  | <b>4.9</b>  | <b>4.1</b>  | <b>3.5</b>  | 0          | 0          | 0          |
| K23                             |   | 0.3 | <b>5.1</b> | ND   | ND  | ND  | ND  | ND | ND | <b>2.5</b>  | <b>1.9</b>  | <b>1.2</b>  | 0.6        | 0          | 0          |
| K5                              |   | 0.1 | <b>7.3</b> | 0    | 0   | 0   | 0   | 0  | 0  | <b>5.2</b>  | 0.9         | 0.3         | 0          | 0          | 0.1        |
| T 57                            |   | 0.2 | <b>4.5</b> | ND   | ND  | ND  | ND  | ND | ND | <b>2.8</b>  | 0.9         | 0.8         | 0          | 0          | 0          |
| K43                             |   | 0.1 | <b>3.3</b> | ND   | ND  | ND  | ND  | ND | ND | 0.9         | 0           | 0           | 0          | 0          | 0.6        |
| K 8                             |   | 0.1 | <b>2.9</b> | ND   | ND  | ND  | ND  | ND | ND | 1.0         | 0           | 0           | 0          | 0          | 0          |
| K44                             |   | 0.1 | <b>2.8</b> | ND   | ND  | ND  | ND  | ND | ND | 0.7         | 0.5         | 0.4         | 0          | 0          | 0          |
| K14                             |   | 0.1 | <b>2.2</b> | ND   | ND  | ND  | ND  | ND | ND | 0.7         | 0           | 0           | 0          | 0          | 0          |
| K 6                             |   | 0.1 | <b>1.3</b> | ND   | ND  | ND  | ND  | ND | ND | 0           | 0           | 0           | 0          | 0          | 0          |
| K 7                             |   | 0.1 | <b>1.2</b> | ND   | ND  | ND  | ND  | ND | ND | 0           | 0           | 0           | 0          | 0          | 0          |

The amount of antibodies is presented as index value. The samples are positive, when the index value  $\geq 1.1$   
 Biotrin ELISA: the index was calculated as the ratio of sample's optical density to cutoff's optical density.

Microgen RecomLine: the blots were scanned and the band density was quantified using ImageJ 1.49 software. The index was calculated as the ratio of sample's band density to cut off's band density. The amount of antibodies is marked as "0", when the bands in RecomLine dot blot were not visible.



Table S3. The cytokine levels (pg/ml) in plasma of rheumatoid arthritis patients

| Cytokine     | B19V DNA positive              |                    |                        | B19V DNA negative  |
|--------------|--------------------------------|--------------------|------------------------|--------------------|
|              | blood & cell-free blood plasma | blood              | cell-free blood plasma |                    |
| IFN $\gamma$ | 64.16 $\pm$ 56.88              | 102.59 $\pm$ 88.18 | 61.58 $\pm$ 87.35      | 85.04 $\pm$ 64.37  |
| IL-2         | 186.03 $\pm$ 208.82            | 24.33 $\pm$ 33.28  | 50.35 $\pm$ 59.88      | 54.28 $\pm$ 102.23 |
| IL-4         | 17.59 $\pm$ 12.94              | 13.65 $\pm$ 16.84  | 23.25 $\pm$ 14.28      | 10.79 $\pm$ 11.12  |
| IL-10        | 26.62 $\pm$ 12.92              | 73.66 $\pm$ 107.35 | 25.49 $\pm$ 15.61      | 53.79 $\pm$ 85.64  |
| IL-12        | 7.14 $\pm$ 4.52                | 5.66 $\pm$ 5.57    | 10.95 $\pm$ 11.03      | 7.55 $\pm$ 8.54    |
| IL-17        | 12.09 $\pm$ 16.86              | 16.73 $\pm$ 5.05   | 10.26 $\pm$ 8.17       | 13.72 $\pm$ 11.67  |
| TNF $\alpha$ | 9.32 $\pm$ 12.92               | 40.83 $\pm$ 40.83  | 21.21 $\pm$ 21.62      | 21.58 $\pm$ 29.91  |

Table S4. Spearman's rank correlation coefficient (r) between the amount of cytokines or antibodies in the blood plasma and clinical data

| Correlation groups       | Rheumatoid arthritis patients |                                 |                        |                         |                  | Healthy persons  |                  |
|--------------------------|-------------------------------|---------------------------------|------------------------|-------------------------|------------------|------------------|------------------|
|                          | B19 <sup>+</sup>              | B19 <sup>+</sup> plasma & blood | B19 <sup>+</sup> blood | B19 <sup>+</sup> plasma | B19 <sup>-</sup> | B19 <sup>+</sup> | B19 <sup>-</sup> |
| Number of analysed       | <b>30</b>                     | <b>8</b>                        | <b>6</b>               | <b>16</b>               | <b>88</b>        | <b>9</b>         | <b>44</b>        |
| IL-2 / IL-12             | <b>0.5 *</b>                  | -                               | 0.5 ns                 | <b>0.91 ***</b>         | -                | -                | -                |
| IL-10 / IL-12            | <b>0.5 **</b>                 | -                               | -                      | <b>0.71 **</b>          | 0.5 ***          | 0.5 ns           | 0.6 ***          |
| IL-12 / disease duration | -                             | -                               | 0.6 ns                 | <b>0.54 *</b>           | -                | ND               | ND               |
| IL-12 / DAS28            | -                             | -                               | -                      | <b>0.53 *</b>           | -                | ND               | ND               |
| IL-10 / CRP              | <b>0.6 **</b>                 | -                               | 0.7 ns                 | <b>0.62 *</b>           | -                | ND               | ND               |
| IL-4 / HgB               | -                             | -                               | -                      | <b>-0.50 *</b>          | -                | ND               | ND               |
| IL-6 / HgB               | <b>-0.5 **</b>                | -                               | -0.6 ns                | <b>-0.69 **</b>         | -                | ND               | ND               |
| IL-6 / CRP               | <b>0.6 **</b>                 | -                               | 0.5 ns                 | <b>0.70 **</b>          | -                | ND               | ND               |
| IFN $\gamma$ / CRP       | -                             | -                               | 0.8 ns                 | <b>0.58 *</b>           | -                | ND               | ND               |
| Number of analysed       | <b>22</b>                     | <b>4</b>                        | <b>5</b>               | <b>13</b>               | <b>33</b>        | <b>9</b>         | <b>19</b>        |
| VP-C / IL-6              | -0.5 ns                       | 0.7 ns                          | - 0.7 ns               | <b>-0.63 *</b>          | -                | -                | -                |
| VP-N/ age                | -                             | -                               | -                      | <b>-0.6 *</b>           | -                | -                | -                |
| VP-1S/ age               | -                             | -                               | -                      | <b>-0.6 *</b>           | -                | -                | -                |
| VP-2r/ age               | -                             | -                               | -                      | <b>-0.61 *</b>          | -                | -                | -                |
| VP-2r / RF               | -                             | -                               | 0.6 ns                 | <b>-0.59 *</b>          | -                | ND               | ND               |
| VP-2P/ WBC               | -                             | -                               | 0.9 ns                 | <b>-0.56 *</b>          | -                | ND               | ND               |

Spearman's rank correlation coefficient (r) is shown only from moderate to very strong correlation ( $r > 0.5$  and  $r < -0.5$ ). Low or negligible correlation (r) between -0.45 and +0.45 is marked as “-”.

The significant results are marked by stars:  $p < 0.05$  (\*),  $p < 0.005$  (\*\*) or  $p < 0.0005$  (\*\*\*), ns- not significant. ND – not done.
